# Supplementary material for: EUS-Guided Biopsy with a Novel Puncture Biopsy Forceps Needle—Feasibility Study
Source: MDPI journal article supplement (doi:10.3390/diagnostics11091638), 2021-09-07
Supplement: s1 [file s1]

## Questionnaire about use of the MTW Puncture Biopsy Forceps

Score each topic on a scale from 1 – 10 (with 1 being the worst/lowest score and 10 being the best possible score). If a topic/question was not applicable in the cases you used the needle on, please write N/A.

1. Overall handling of the needle  
score 1 – 10: \_\_\_\_\_
2. Puncturing of the lesion  
score 1 – 10: \_\_\_\_\_
3. Opening of the biopsy forceps in the lesion  
score 1 – 10: \_\_\_\_\_
4. Closing of the biopsy forceps in the lesion  
score 1 – 10: \_\_\_\_\_
5. Use of the needle in bended scope position  
score 1 – 10: \_\_\_\_\_
6. Visibility of the needle on US imaging  
score 1 – 10: \_\_\_\_\_
7. Robustness of the needle  
score 1 – 10: \_\_\_\_\_
8. Is the tissue yield satisfactory?  
score 1 – 10: \_\_\_\_\_

For the questions below, please circle either 'Yes' or 'No' and explain below.

9. Did you experience a learning curve in the use of the needle?

Yes - No

Why Yes/No:

---

---

---

10. Would you keep using the needle?

Yes - No

Why Yes/No:

---

---

---

11. Would you recommend the needle to colleagues?

Yes - No

Why Yes/No:

---

---

---

12. Did you experience any problems with the needle (e.g. breaking of parts)?

Yes - No

Why Yes/No:

---

---

---

13. General remarks:

---

---

---
